# Supplementary material
Source: Springer Nature journal article supplement (https://www.springermedizin.de/resource/supplementary/13256_2012_2172_MOESM1_ESM.pdf/9649164)

**a**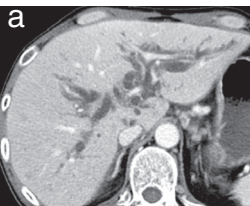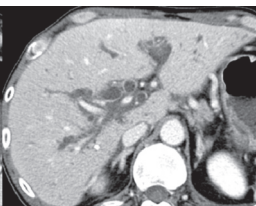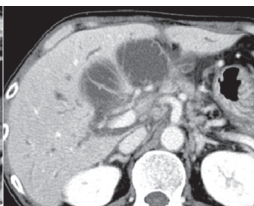**b**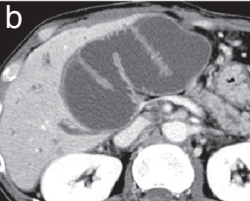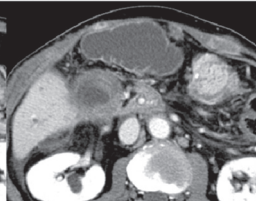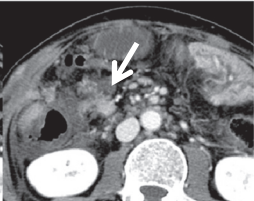

Supplement: MOESM1 [file 9649164]
